# Supplementary material for: Risk factors for recovery from oculomotor nerve palsy after aneurysm surgery: a meta-analysis
Source: PeerJ. 2024 Oct 29;12:e18207. doi: 10.7717/peerj.18207 (PMC11529594; doi:10.7717/peerj.18207)
Supplement: Supplemental Information 5 [file peerj-12-18207-s005.xlsx]

## Sheet: Sheet1
								Complete palsy				Partial palsy				subarachnoid hemorrhage				Vascular risk factors				Endovascular treatment				Surgery
study	year	study design	country	sample size	gender(M/F)	mean age	Tumor type	revent	rtotal	nrevent	nrtotal	revent	rtotal	nrevent	nrtotal	revent	rtotal	nrevent	nrtotal	revent	rtotal	nrevent	nrtotal	revent	rtotal	nrevent	nrtotal	revent	rtotal	nrevent	nrtotal
Engelhardt	2015	case control	France	23	4/19	47.8	internal aneurysm	16	20	3	3	4	20	0	3	14	20	3	3	9	20	2	3	11	20	3	3	9	20	0	3
Gao	2017	case control	china	52	8/44	53.9	Intracranial aneurysm
Hu	2021	cohort study	china	128	60/68	52.8	Intracranial aneurysm
Liu	2020	cohort study	china	152	70/82	55.6	posterior communicating aneurysm
Zhong	2019	case control	china	102	85/17	59.8	posterior communicating aneurysm	61	100	1	2	39	100	1	2
Liu	2023	cohort study	china	68	8/60	56.59	posterior communicating aneurysm
Wu	2010	case control	china	19	1/18	53	posterior communicating aneurysm
Song	2012	cohort study	china	31	8/23	50.4	posterior communicating aneurysm
Wang	2015	cohort study	china	55	16/39	52	posterior communicating aneurysm
Xue	2020	cohort study	china	50	8/42	57	posterior communicating aneurysm
Tan	2014	cohort study	china	132	58/74	55	posterior communicating aneurysm
Zhao	2019	cohort study	china	54	NR	55	posterior communicating aneurysm

## Sheet: Sheet2
		Gender			age			Size of the aneurysm			Rupture of the aneurysm			Preoperative complete ONP			Treatment time			surgey			Hypertension			Dyslipidemia			SAH
study	year	or	lci	uci	or	lci	uci	or	lci	uci	or	lci	uci	or	lci	uci	or	lci	uci	or	lci	uci	or	lci	uci	or	lci	uci	or	lci	uci
Gao	2017	0.825	0.058	11.742	0.974	0.901	1.054	0.672	0.409	1.105	1.192	0.118	5.945	3.034	0.159	19.734	0.958	0.905	1.014	24.3902	4.16419	142.857
Hu	2021	0.76	0.439	1.317	1.217	0.873	1.696	0.816	0.396	1.68				0.812	0.619	1.09				5.582	2.203	15.045
Liu	2020	0.73	0.42	1.271	1.125	0.909	1.392	0.832	0.657	1.054				1.365	0.788	2.365				2.625	1.423	4.841	0.473	0.164	1.361	0.567	0.242	1.327	1.276	1.043	1.562
Zhong	2019													6.45161	2.41415	17.2414													1.264	0.645	3.473
Liu	2023							6.101	0.285	1.38
Wu	2020				0.23	0.023	24.02	0.21	0.206883	1.07																			1.11	0.67	6.72344
Song	2012																												11.63	1.12	121.37
Wang	2015													5.366	1.253	22.974
Xue	2020																1.14339	1.03458	1.69554
Tan	2014				1.046	0.094	1.01	0.983	0.699	1.382				0.519	0.132	1.006	1.015	0.94	1.095	36.368	7.556	47.603
Zhao	2019													28.04	2.623	299.718	21.528	1.769	261.99
				or	lci	uci	b			se
				0.01	0.058	0.42	-4.60517	-2.84731	-0.867501	-0.896866	-6.36303
				100	580	17.2414	4.60517
								exp(b-1.96*se)=or	b-1.96*se=-4.96
			b	or	se	lci	uci
			2.009	0.134	2.009	-3.80364					0.134	0.034	0.528	1.14339	1.03458	1.69554
			2.009	0.134		0.145346	382.466

## Sheet: Gender_x0009__x0009_
study	year	or	lci	uci
Gao	2017	0.825	0.058	11.742
Hu	2021	0.76	0.439	1.317
Liu	2020	0.73	0.42	1.271

## Sheet: age
study	year	or	lci	uci
Gao	2017	0.974	0.901	1.054
Hu	2021	1.217	0.873	1.696
Liu	2020	1.125	0.909	1.392
Wu	2010	0.23	0.023	24.02
Tan	2014	1.006	0.094	1.01

## Sheet: Size of the aneurysm_x0009__x0009_
study	year	or	lci	uci
Gao	2017	0.672	0.409	1.105
Hu	2021	0.816	0.396	1.68
Liu	2020	0.832	0.657	1.054
Liu	2023	6.18	0.285	130.55					lci
Tan	2014	0.983	0.699	1.382

## Sheet: Preoperative complete ONP
study	year	or	lci	uci
Gao	2017	3.034	0.159	19.734
Hu	2021	0.812	0.619	1.09
Liu	2020	1.365	0.788	2.365
Zhong	2019	6.45161	2.41415	17.2414
Wang	2015	5.366	1.253	22.974
Tan	2014	0.519	0.132	1.006
Zhao	2019	28.04	2.623	299.718

## Sheet: Treatment time_x0009__x0009_
study	year	or	lci	uci
Gao	2017	0.958	0.905	1.014
Xue	2020	1.14339	1.03458	1.69554
Tan	2014	1.015	0.94	1.095
Zhao	2019	21.528	1.769	261.99

## Sheet: surgey_x0009__x0009_
study	year	or	lci	uci
Gao	2017	24.3902	4.16419	142.857
Hu	2021	5.582	2.203	15.045
Liu	2020	2.625	1.423	4.841
Tan	2014	36.368	7.556	47.603

## Sheet: ccc
study	year	or	lci	uci
Liu	2020	1.276	1.043	1.562
Zhong	2019	1.264	0.645	3.473
Wu	2010	1.11	0.67	6.72344
Song	2012	11.63	1.12	121.37
